# Supplementary material
Source: ML conference proceedings conference paper supplement (https://openreview.net/forum?id=T0glCBw28a)
Supplement: supplementary_material [file attachment]

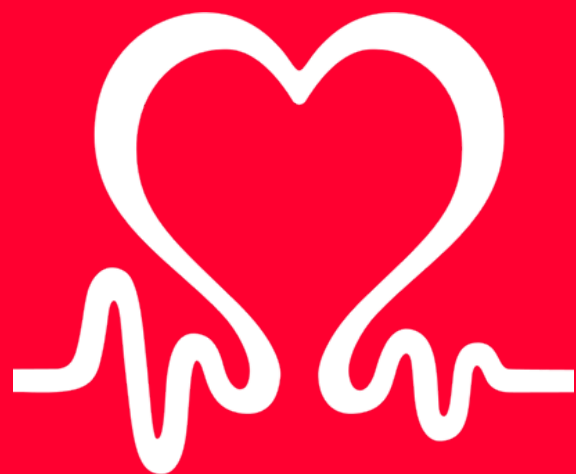

**British Heart  
Foundation**

# **Global Heart & Circulatory Diseases Factsheet**

January 2024

# Heart & Circulatory Diseases (Cardiovascular Disease; CVD)

Heart and circulatory diseases is an umbrella term for all diseases of the heart and circulation. It includes everything from conditions that are inherited or that a person is born with, to those that develop later, such as coronary heart disease, atrial fibrillation, heart failure, stroke and vascular dementia.

- There are around 620 million people living with heart and circulatory diseases across the world – this number has been rising due to changing lifestyles, an ageing and growing population, and improved survival rates from heart attacks and strokes – and will continue to rise if these trends continue.
- Globally it's estimated that 1 in 13 people are living with a heart or circulatory disease.
- In 2019 globally there were more women than men living with heart and circulatory diseases – around 290 million women (53 per cent) and 260 million men.
- In 1990 an estimated 285 million people were living with heart and circulatory diseases globally; this rose to 350 million in 2000 and more than 430 million in 2010.
- Since 1997, the number of people living with heart and circulatory diseases globally has doubled.
- The most common cardiovascular conditions are coronary (ischaemic) heart disease (global prevalence estimated at 200 million in 2019), peripheral arterial (vascular) disease (110 million), stroke (100 million) and atrial fibrillation (60 million).
- Each year around 60 million people across the world develop a heart or circulatory disease – that's almost the same as the entire population of the UK.

# Global Heart & Circulatory Disease Prevalence in 2021

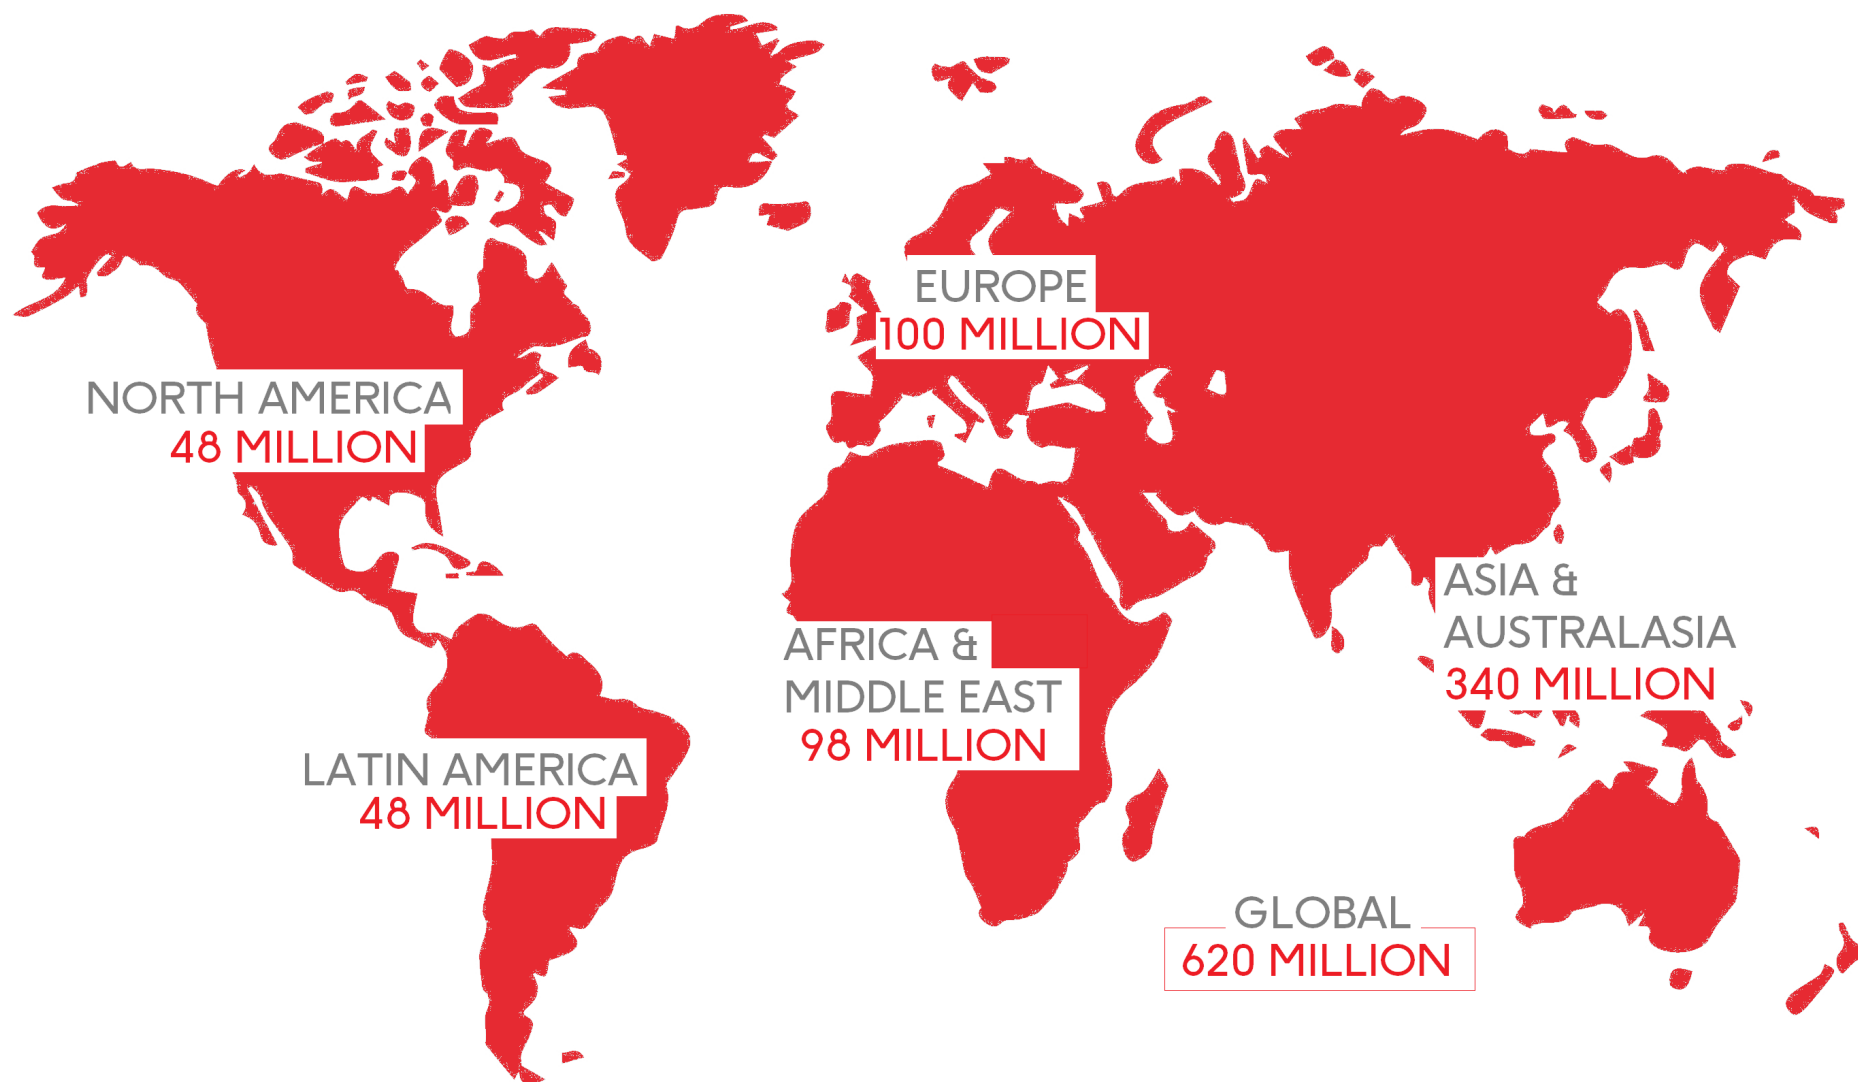

# Global Deaths from Heart & Circulatory Diseases

- Heart and circulatory diseases cause around 1 in 3 deaths globally; an estimated 20.5 million deaths in 2021 - an average of 56,000 people each day or one death every 1.5 seconds. They are the world's biggest killers.
- Globally, heart and circulatory diseases killed an estimated 9.8 million men and 9.2 million women in 2019.
- The proportion of deaths attributed to heart and circulatory diseases has been rising - in 1990 heart and circulatory diseases caused just over 1 in 4 (27 per cent) of all global deaths.
- The global number of deaths from heart and circulatory diseases is projected to rise further.
- Age-standardised death rates from heart and circulatory diseases have been falling across the world – this is primarily due to improvements in life expectancy. But such trends have led to more people living to an age when it is more common to develop, or die from, heart and circulatory diseases.

## Biggest Killers Worldwide

NB coverage and accuracy will vary between nations, and 2019 estimates will be modelled on historical mortality data, where available. The Lancet's Global Burden of Disease (GBD) and the World Health Organization (WHO) have both produced 2019 data. We present GBD data on the next page; see references for alternative analysis by the WHO.

Please note the following GBD estimates were made in 2019 – i.e. before the coronavirus pandemic.

## Biggest Killers Worldwide (GBD 2019 Estimates)

| MEN |                              |             | WOMEN                        |             | TOTAL                        |             |
|-----|------------------------------|-------------|------------------------------|-------------|------------------------------|-------------|
| 1   | Coronary heart disease       | 5.0 million | Coronary heart disease       | 4.2 million | Coronary heart disease       | 9.1 million |
| 2   | Stroke                       | 3.3 million | Stroke                       | 3.2 million | Stroke                       | 6.6 million |
| 3   | COPD                         | 1.9 million | COPD                         | 1.4 million | COPD                         | 3.3 million |
| 4   | Lung cancer                  | 1.4 million | Lower respiratory infections | 1.2 million | Lower respiratory infections | 2.5 million |
| 5   | Lower respiratory infections | 1.3 million | Alzheimer's/dementia         | 1.0 million | Lung cancer                  | 2.0 million |

*NB some figures do not add up due to rounding; COPD = chronic obstructive pulmonary disease*

- Heart and circulatory diseases are the world's biggest killers – in 2019 coronary heart disease was the single biggest killer globally, and stroke was the second biggest – true for both men and women.
- Other common cardiovascular causes of death are hypertensive heart disease, atrial fibrillation and rheumatic heart disease.

## Highest & Lowest Cardiovascular Death Rates Worldwide

| HIGHEST |             | ASDR 2021 |
|---------|-------------|-----------|
| 1       | Uzbekistan  | 798.3     |
| 2       | Nauru       | 721.7     |
| 3       | Azerbaijan  | 626.5     |
| 4       | Tajikistan  | 624.6     |
| 5       | Afghanistan | 600.2     |

| LOWEST |             | ASDR 2021 |
|--------|-------------|-----------|
| 1      | Japan       | 75.6      |
| 2      | Singapore   | 81.5      |
| 3      | Israel      | 82.4      |
| 4      | France      | 83.5      |
| 5      | South Korea | 89.6      |

*ASDR = Age-Standardised Death Rates for cardiovascular disease – heart and circulatory diseases - CVD (ICD-10 I00-99)*

*For comparative purposes, the UK ASDR in 2021 was 118 and the global ASDR was 245.*

*Please note that these are modelled estimates, based on national sources which may have different statistical and clinical definitions.*

- The age-standardised death rate for heart and circulatory diseases in Uzbekistan is over ten times higher than that of Japan.

# Estimated Deaths from Heart & Circulatory Diseases (2021)

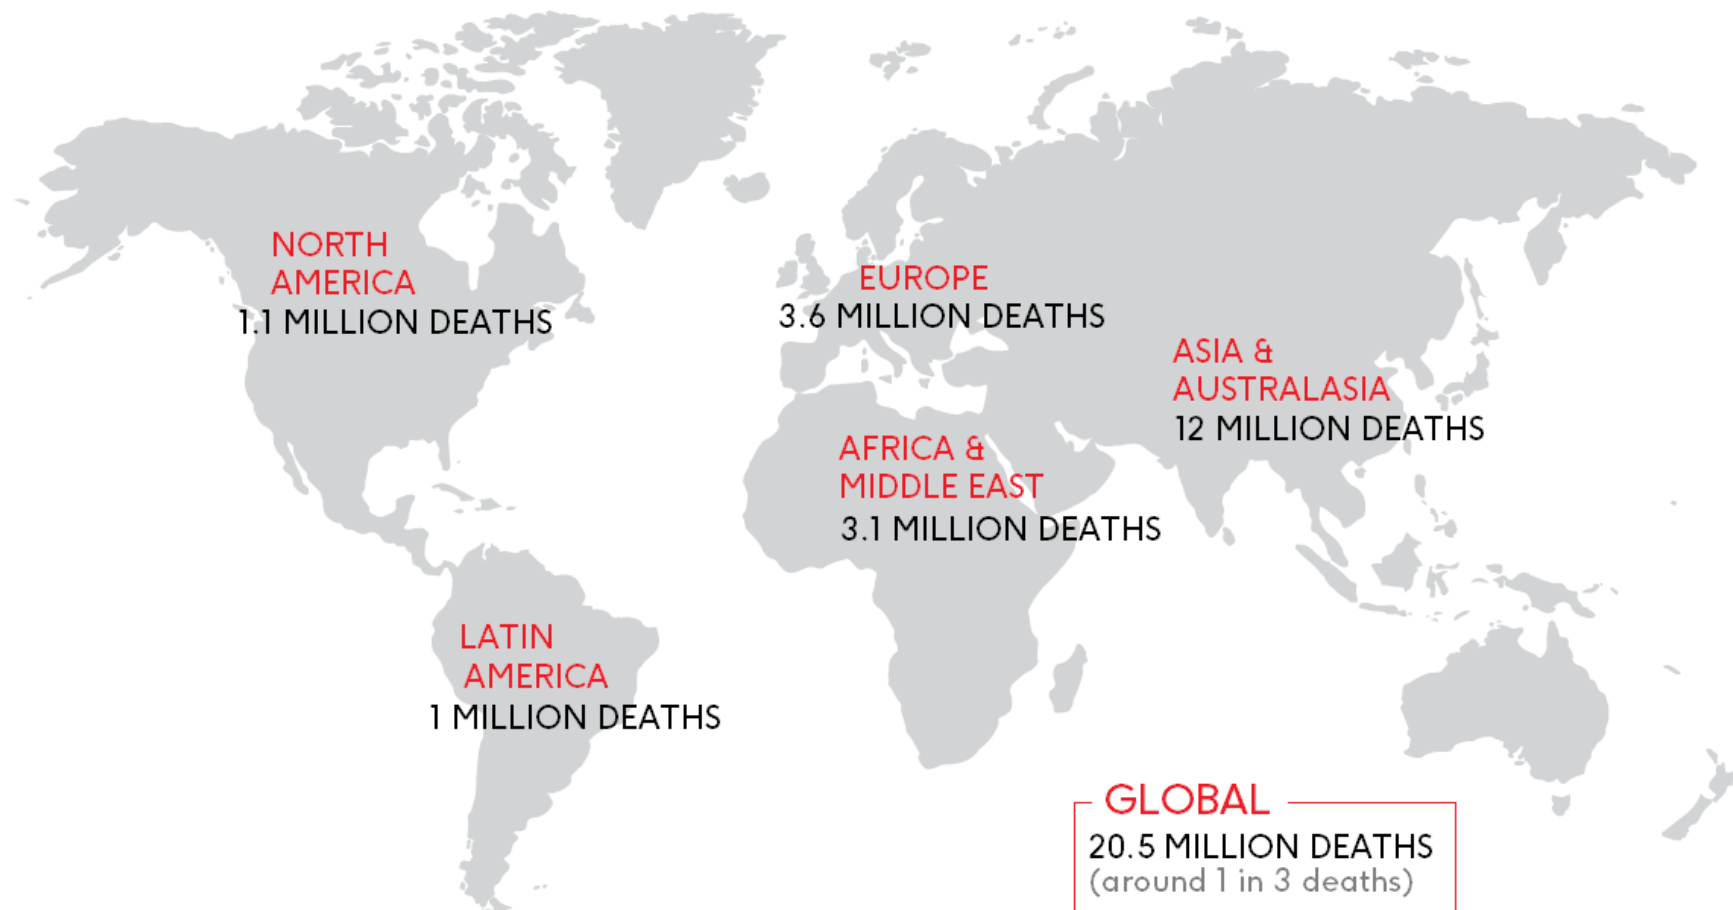

# Coronary Heart Disease (Ischaemic Heart Disease; CHD)

- Coronary (ischaemic) heart disease is the most commonly diagnosed heart disease worldwide.
- It's estimated around 200 million people are living with coronary heart disease.
- Globally around 110 million men and 80 million women have coronary heart disease.
- Coronary heart disease kills an estimated nine million people each year – in 2019 it was the world's single biggest killer.
- Around 1 in 6 deaths globally are caused by coronary heart disease.
- Before the coronavirus pandemic, coronary heart disease had been the leading cause of death worldwide for at least 30 years.
- Worldwide, coronary heart disease is now killing more people than ever before.
- It's estimated that in 2018, CHD overtook neonatal disorders as the biggest cause of premature mortality worldwide (when defined as deaths before the 70<sup>th</sup> birthday).

# Stroke (Cerebrovascular Disease; CBVD)

- There are an estimated 100 million stroke survivors worldwide.
- Globally around 56 million women and 45 million men are stroke survivors.
- Stroke was the second most common killer globally in 2019, causing an estimated 6.6 million deaths.
- 1 in 9 deaths globally are caused by cerebrovascular disease (stroke).
- Stroke is the second biggest cause of premature mortality worldwide (when defined as deaths before the 70<sup>th</sup> birthday).

# Heart Failure

- It's estimated that heart failure affects at least 64 million worldwide (and numbers have been increasing).

# Congenital Heart Disease

- Congenital heart disease is a large and rapidly emerging global problem in child health.
- Congenital heart disease is diagnosed in around 1 in 110 births globally, with more diagnoses later in life - that's an estimated 1.2 million babies a year - an average of 3,300 per day (or a diagnosis every 26 seconds)
- Globally congenital heart disease is the direct cause of at least 220,000 deaths each year, the majority are before the first birthday.
- It's estimated at least 13 million people are living with congenital heart disease worldwide; there are likely to be millions more undiagnosed.

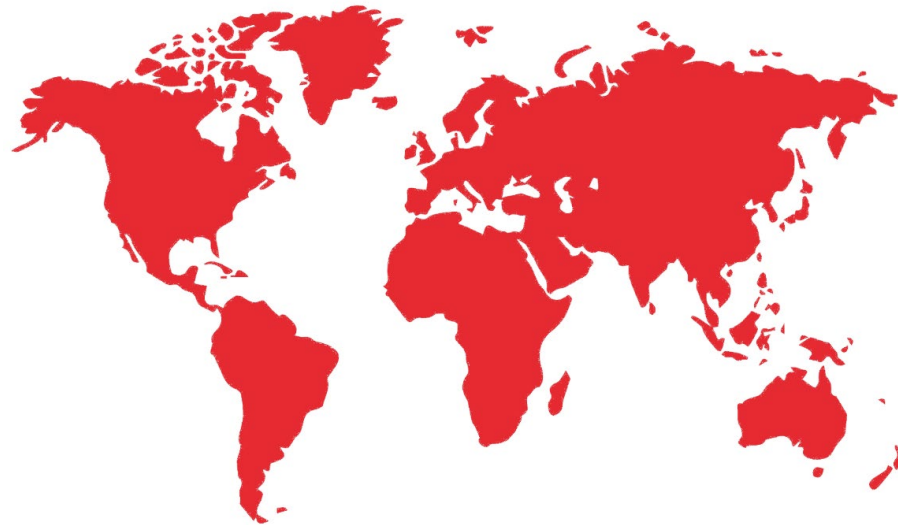

**Our vision is a world free from the  
fear of heart and circulatory diseases.**

# Risk Factors

- Globally more than 4 in 5 deaths from heart and circulatory diseases are associated with modifiable risk factors.
- Modifiable risk factors are often preventable; in most cases risk can be reduced with medical treatment and lifestyle changes \*\*
- Environmental risk factors (e.g. air pollution) also have a significant impact on cardiovascular risk, as well as gender, age, family history and ethnicity.

## Global Risk Factors for Heart & Circulatory Diseases (CVD)

Associated or attributable burden relating to cardiovascular mortality

| MODIFIABLE RISK FACTOR & ATTRIBUTABLE BURDEN |                                                      | 2021 CVD DEATHS | % OF BURDEN |
|----------------------------------------------|------------------------------------------------------|-----------------|-------------|
| 1                                            | High systolic blood pressure (hypertension)          | 10.8 million    | 53%         |
| 2                                            | Dietary risks (poor diet)                            | 6.6 million     | 32%         |
| 3                                            | High LDL cholesterol (raised cholesterol)            | 3.8 million     | 19%         |
| 4                                            | Air pollution (ambient particulate matter pollution) | 3.1 million     | 15%         |
| 5                                            | Tobacco (cigarette smoking; second-hand smoke)       | 2.4 million     | 12%         |
| 6                                            | High fasting plasma glucose (diabetes)               | 2.3 million     | 11%         |
| 7                                            | High body-mass index (obesity and excess weight)     | 2.0 million     | 10%         |
| 8                                            | Kidney dysfunction (renal failure)                   | 1.9 million     | 9%          |

Other modifiable risk factors include physical inactivity, built environment, non-optimal temperature (low/high) and alcohol misuse.

*NB \*\* modifiable risk factors are affected by the circumstances in which we live. Our social, physical and commercial environments all have an impact on factors like our access to healthier foods, exposure to environmental risks and health-related behaviours.*

"As much as 80% of cardiovascular disease can be prevented if we create better infrastructure, expand access to care, rethink the ways we produce and consume food and clean up the air we breathe,"

*Professor Fausto Pinto, President of the World Heart Federation (WHF)*

## About the British Heart Foundation (BHF)

One in four of us in the UK and one in three globally die from heart and circulatory diseases. That's why the British Heart Foundation funds world-leading research into their causes, prevention and treatment. Advances from our research have saved and improved millions of lives, but heart diseases, stroke, vascular dementia and their risk factors such as diabetes still cause heartbreak on every street. With the public's support, our funding will drive the new discoveries to end that heartbreak.

This factsheet compiled by the British Heart Foundation - published January 2024.  
Factsheets also available for the UK, England, Scotland, Wales and Northern Ireland.

For any queries, [contact us](#) and we will do our best to help - **please mark for the attention of the Health Intelligence team.**

[bhf.org.uk/donate](https://bhf.org.uk/donate)

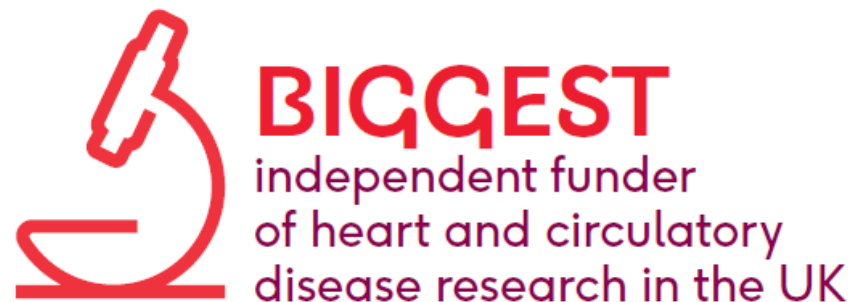

# References

| STATISTIC                                                                                                                                                                                                                                                                                                                             | REFERENCE                                                                                                                                                                                                                                                                                                                                                                                                                                                                                                                                                          |
|---------------------------------------------------------------------------------------------------------------------------------------------------------------------------------------------------------------------------------------------------------------------------------------------------------------------------------------|--------------------------------------------------------------------------------------------------------------------------------------------------------------------------------------------------------------------------------------------------------------------------------------------------------------------------------------------------------------------------------------------------------------------------------------------------------------------------------------------------------------------------------------------------------------------|
| CVD here is all heart and circulatory diseases - cardiovascular disease (ICD-10 I00-99), congenital heart/circulatory diseases (Q20-28) and vascular dementia (F01) or ICD10 I00-99 alone, depending on the resource and statistic – please enquire. Also Global Burden of Disease updates have been delayed by the Covid-19 pandemic |                                                                                                                                                                                                                                                                                                                                                                                                                                                                                                                                                                    |
| CVD global mortality estimates; prevalence by continent; Modifiable risk factors, attributable burden; country ASDR rankings [2021 estimates]                                                                                                                                                                                         | Lindstrom et al (2022) Global Burden of Cardiovascular Diseases and Risks Collaboration, 1990-2021, JACC <a href="http://www.sciencedirect.com/science/article/pii/S0735109722072497">www.sciencedirect.com/science/article/pii/S0735109722072497</a>                                                                                                                                                                                                                                                                                                              |
| CVD mortality forecasts                                                                                                                                                                                                                                                                                                               | World Health Organization (WHO) (2018) projections <i>[NB this page is no longer available]</i>                                                                                                                                                                                                                                                                                                                                                                                                                                                                    |
| Biggest killers/mortality rankings                                                                                                                                                                                                                                                                                                    | World Health Organization (2020) Global Health Estimates for 2019 <a href="http://www.who.int/data/global-health-estimates">www.who.int/data/global-health-estimates</a><br><a href="http://www.who.int/news/item/09-12-2020-who-reveals-leading-causes-of-death-and-disability-worldwide-2000-2019">www.who.int/news/item/09-12-2020-who-reveals-leading-causes-of-death-and-disability-worldwide-2000-2019</a><br>also <a href="http://www.who.int/health-topics/cardiovascular-diseases">www.who.int/health-topics/cardiovascular-diseases</a>                  |
| CHD prevalence, deaths, time trends, premature mortality #1 (based on under-70s mortality * AND years of life lost (YLLs))                                                                                                                                                                                                            | Global Burden of Disease (2020) data - estimates for 2019 <a href="http://ghdx.healthdata.org/gbd-results-tool">http://ghdx.healthdata.org/gbd-results-tool</a>                                                                                                                                                                                                                                                                                                                                                                                                    |
| Stroke prevalence, deaths, premature mortality #2 (based on under-70s mortality * - #3 based on YLLs)                                                                                                                                                                                                                                 | Global Burden of Disease (2020) data - estimates for 2019 <a href="http://ghdx.healthdata.org/gbd-results-tool">http://ghdx.healthdata.org/gbd-results-tool</a>                                                                                                                                                                                                                                                                                                                                                                                                    |
| Heart failure prevalence                                                                                                                                                                                                                                                                                                              | Bragazzi et al (2019) Burden of heart failure and underlying causes, EJPC <a href="https://academic.oup.com/eurjpc/advance-article/doi/10.1093/eurjpc/zwaa147/6133248">https://academic.oup.com/eurjpc/advance-article/doi/10.1093/eurjpc/zwaa147/6133248</a>                                                                                                                                                                                                                                                                                                      |
| Congenital heart disease birth prevalence (incidence)                                                                                                                                                                                                                                                                                 | Liu et al (2019) Global birth prevalence of congenital heart defects 1970–2017: updated systematic review and meta-analysis <a href="https://academic.oup.com/ije/article/48/2/455/5345120">https://academic.oup.com/ije/article/48/2/455/5345120</a><br>van der Linde et al (2011) Birth Prevalence of Congenital Heart Disease Worldwide: A Systematic Review and Meta-Analysis <a href="https://www.jacc.org/doi/full/10.1016/j.jacc.2011.08.025">https://www.jacc.org/doi/full/10.1016/j.jacc.2011.08.025</a><br>BHF analysis of global birth data (estimated) |
| Congenital heart disease prevalence (living with)                                                                                                                                                                                                                                                                                     | Global Burden of Disease (2020) data - estimates for 2019 <a href="http://ghdx.healthdata.org/gbd-results-tool">http://ghdx.healthdata.org/gbd-results-tool</a>                                                                                                                                                                                                                                                                                                                                                                                                    |
| World Heart Federation (WHF) quote                                                                                                                                                                                                                                                                                                    | WHF 2023 press release <a href="https://world-heart-federation.org/news/four-paths-to-better-cardiovascular-health-world-heart-vision-2030/">https://world-heart-federation.org/news/four-paths-to-better-cardiovascular-health-world-heart-vision-2030/</a>                                                                                                                                                                                                                                                                                                       |

\* Please note this definition is relevant to premature mortality in developed nations, but would not be appropriate for the entire globe

For any queries, [contact us](#) and we will do our best to help – [please mark for the attention of the Health Intelligence team](#)
